# Supplementary material for: [18F]CB251 PET/MR imaging probe targeting translocator protein (TSPO) independent of its Polymorphism in a Neuroinflammation Model
Source: PubMed Central journal article supplement (PMC7415805; doi:10.7150/thno.46875), 2020-07-23
Supplement: thnov10p9315s1.pdf [file thnov10p9315s1.pdf]

A

### TSPO ligand binding classification

| TSPO genotype           |                      | Ligand Binding Phenotype |
|-------------------------|----------------------|--------------------------|
| DNA polymorphism rs6971 | Protein position 147 |                          |
| Wild type               | C/C                  | HAB*                     |
| Mutant                  | T/T                  | LAB*                     |

HAB High Affinity Binder ; LAB Low Affinity Binder

B

### Vectors for TSPO Mutagenesis

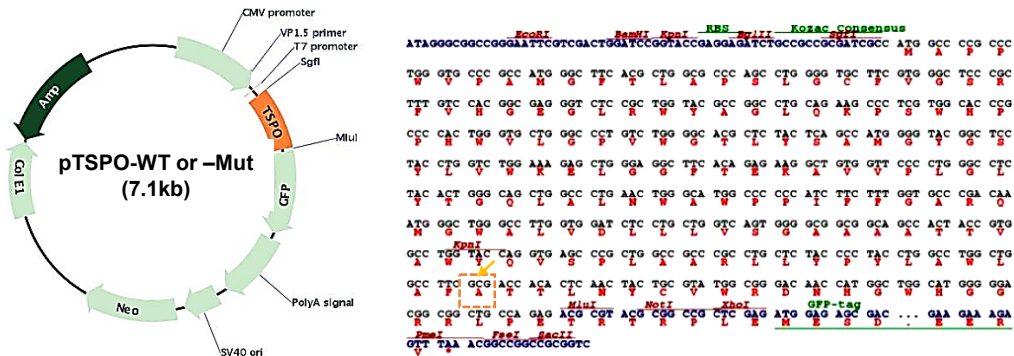

**FIGURE S1. TSPO genotypes and classification.** (A) TSPO ligand binding classification. Single nucleotide polymorphism rs6971 TSPO (C→T point mutation; rs6971 A147T; Ala to Thr at amino acid 147 of TSPO) influences the binding affinity of TSPO ligands. TSPO with Thr/Thr at amino acid 147 shows a lower binding affinity to its ligand. TSPO ligand binding phenotypes are HAB or LAB, which indicate high- or low-affinity binding of ligands, respectively \*Adapted from ref 32, 33. (B) Expression vector design for TSPO mutagenesis.
